# Supplementary material for: SFRP1 increases TMPRSS2-ERG expression promoting neoplastic features in prostate cancer in vitro and in vivo
Source: Springer Nature journal article supplement (doi:10.1186/s12935-020-01333-5), 2020-07-16

Figure S1

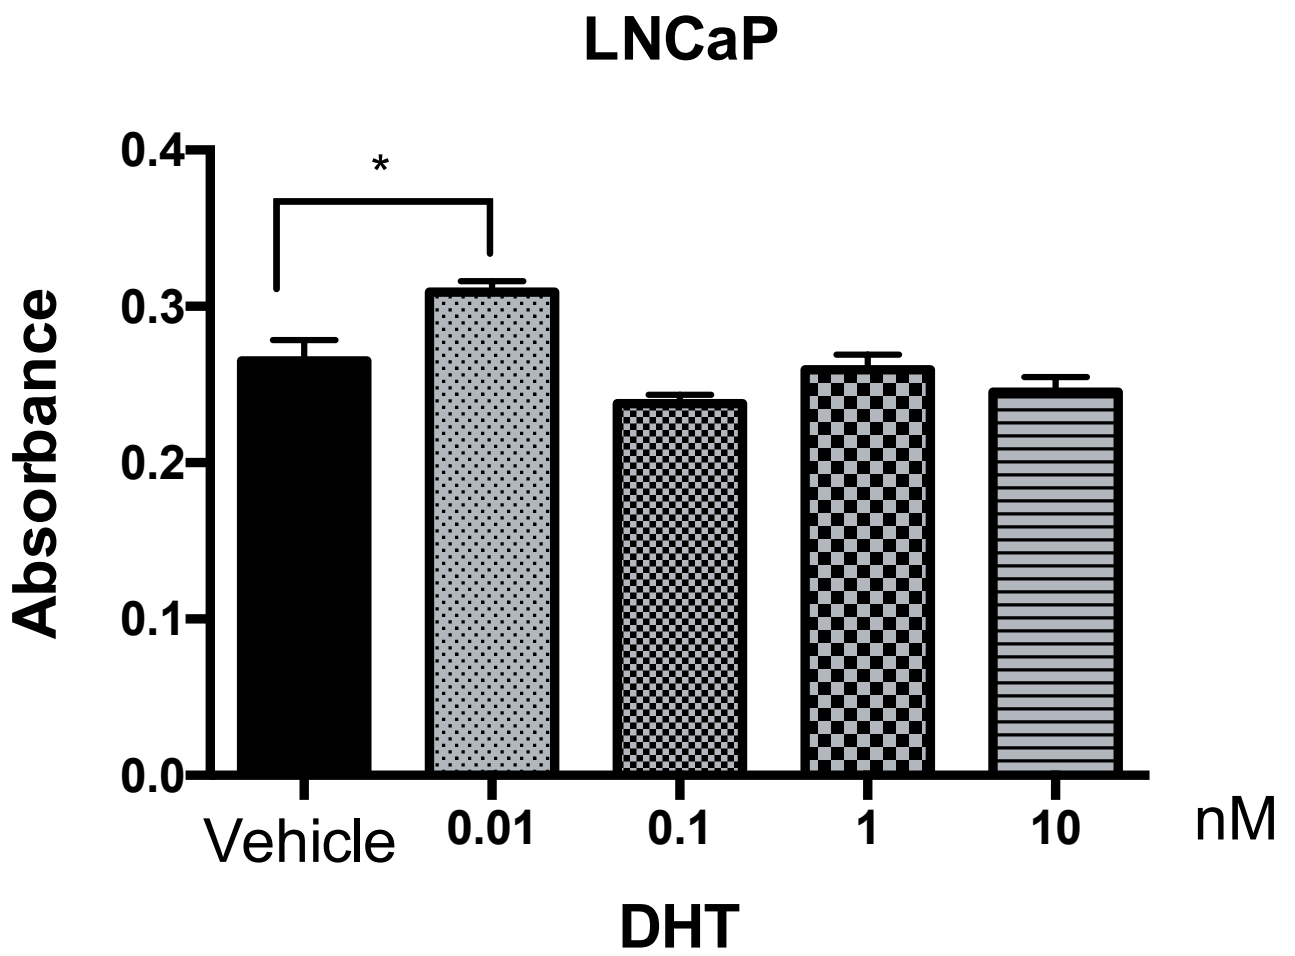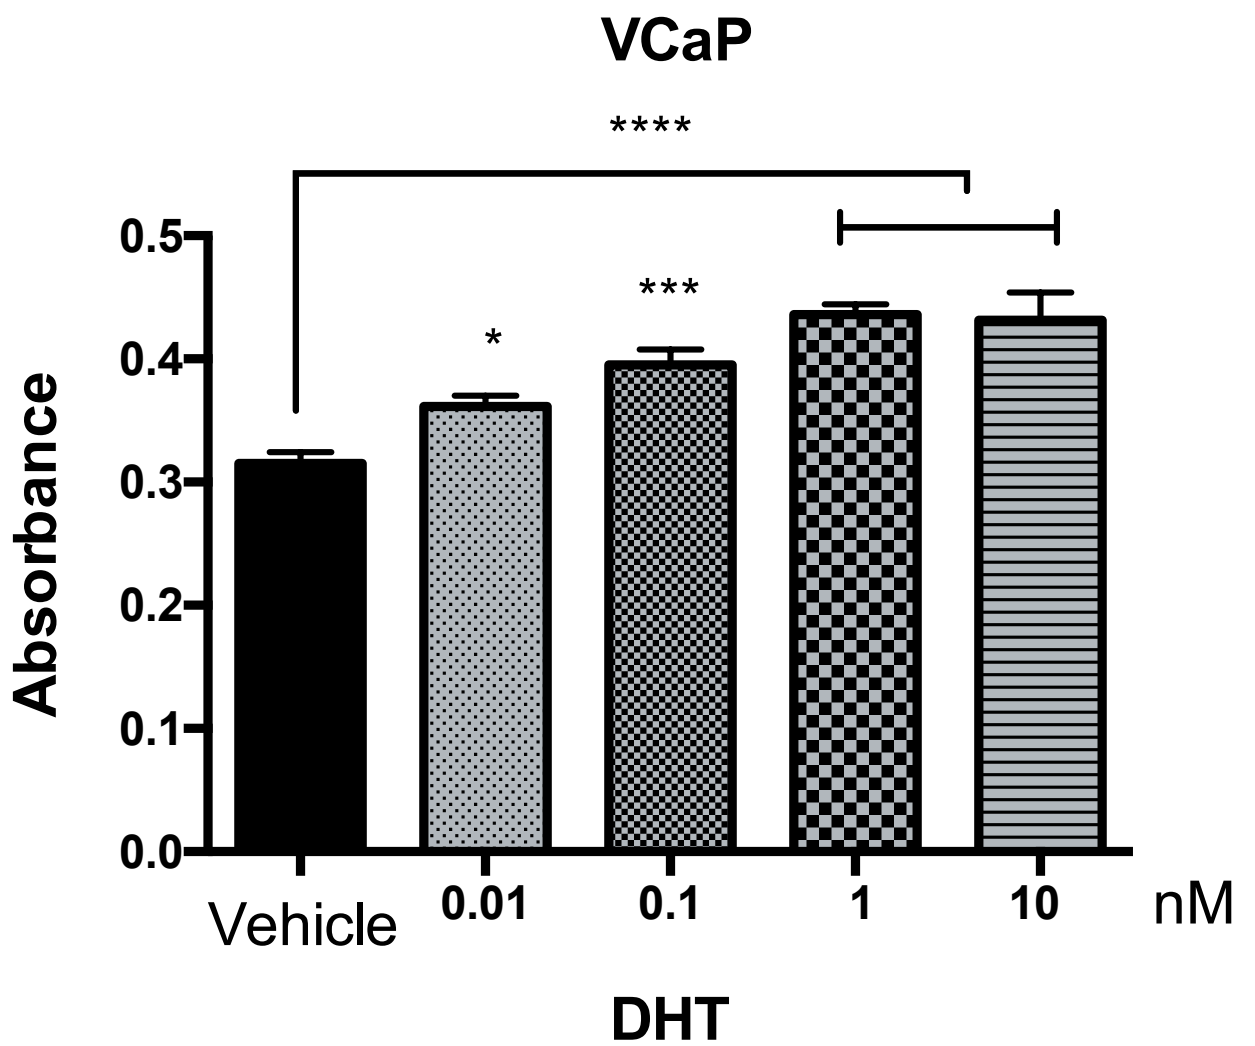

### Figure S2

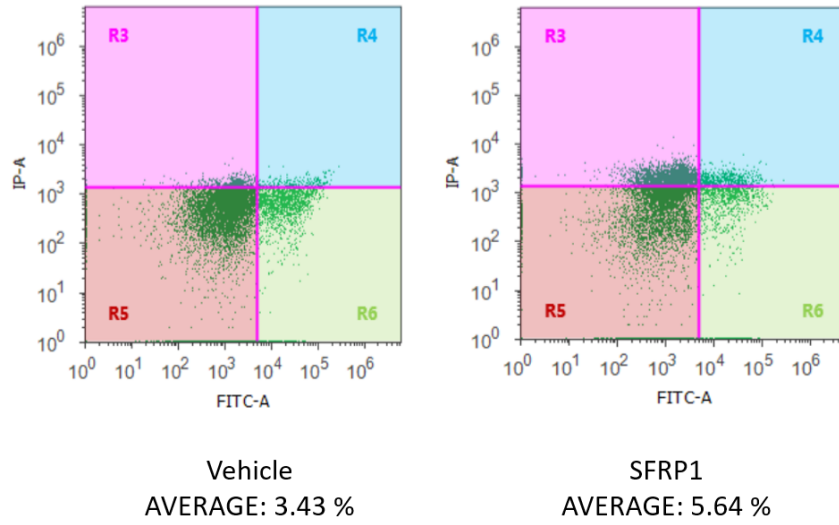

### Figure S3

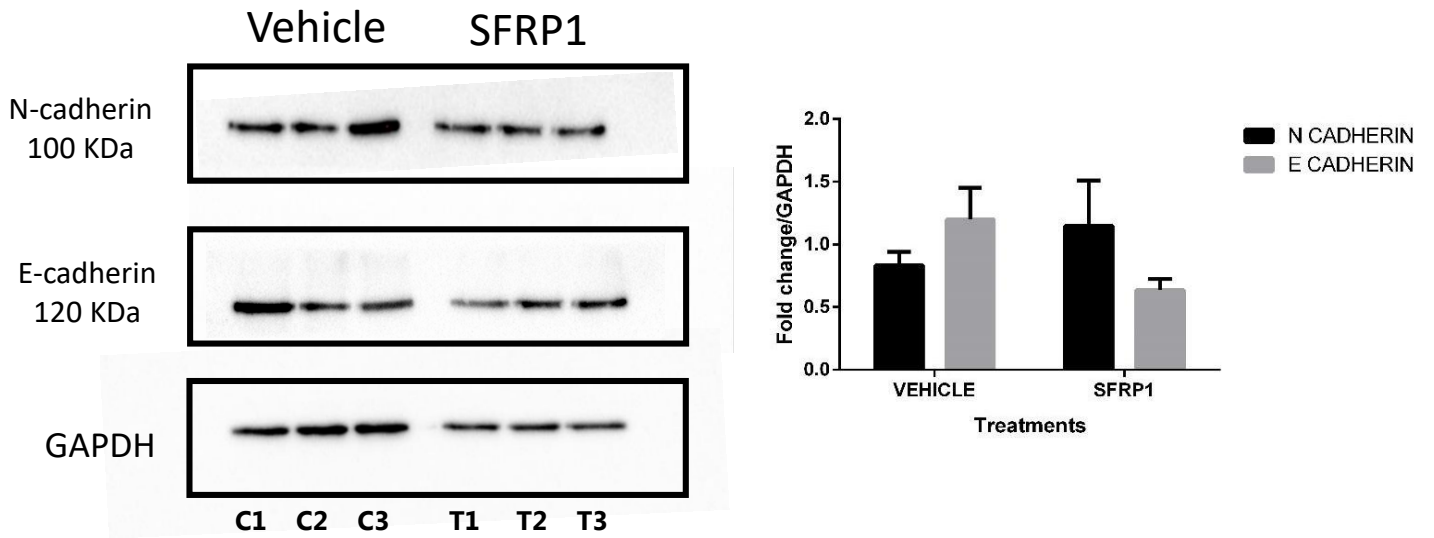

### Figure S4

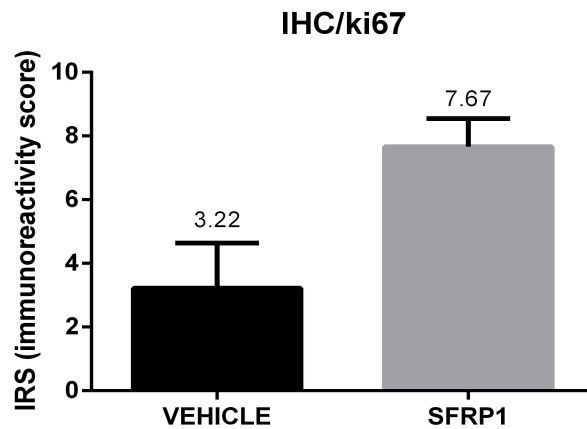

Supplement: MOESM1 [file 18189866]
